# Supplementary material for: A Unified System for Evaluating, Ranking and Clustering in Diverse Scientific Domains
Source: Copernicus journal article supplement (doi:10.5194/gmd-2024-82), 2024-05-30
Supplement: Supplementary file 1 [file gmd-2024-82-supplement.pdf]

Supporting Information for  
**A Unified System for Evaluating, Ranking and Clustering in SDGs**

Zengyun Hu<sup>1,2,3</sup>, Xi Chen<sup>2,3,4\*</sup>, Deliang Chen<sup>5</sup>, Qiming Zhou<sup>6,7</sup>, Qingxiang Li<sup>8</sup>,

Zhuo Zhang<sup>2,3</sup>

<sup>1</sup>Shanghai Jiao Tong University, Shanghai 200025, China

<sup>2</sup>State Key Laboratory of desert and Oasis Ecology, Xinjiang Institute of Ecology and Geography, Chinese Academy of Sciences, Urumqi, Xinjiang 830011, China

<sup>3</sup>Research Center for Ecology and Environment of Central Asia,  
Chinese Academy of Sciences, Urumqi, Xinjiang 830011, China

<sup>4</sup>University of Chinese Academy of Sciences, Beijing 100049, China

<sup>5</sup>Department of Earth Sciences, University of Gothenburg, Gothenburg 405 30,  
Sweden

<sup>6</sup>University of Wuhan, Wuhan, China

<sup>7</sup>Department of Geography, Hong Kong Baptist University, Kowloon, Hong Kong

<sup>8</sup>School of Atmospheric Sciences, Sun Yat-Sen University, Zhuhai, China

## **Wide Application and Third-Party Evaluations of CCHZ-DISO**

Since its initial publication, CCHZ-DISO has garnered significant traction and witnessed widespread application, garnering over 100 citations in the Web of Science within the past three years. In this section, we showcase a selection of notable objective and positive evaluations from third-party sources, underscoring the impact and utility of the CCHZ-DISO system.

Kalmar et al. (2021) first recommended the DISO index for assessing historical regional precipitation simulations with the RegCM4.5 model. They compared DISO and Taylor diagram methods and found that “The advantage of using DISO versus the Taylor diagram is that the comprehensive performances of the different models are still not quantified by the latter”. In a sensitivity analysis of soil water and heat transfer parameters in community land surface models, Deng et al. (2021) introduced DISO, as discussed in section 2.3 of their paper published in the “*Journal of Advances in Modeling Earth Systems*”. Moreover, they declared that “In this paper, the most important and best advantage of DISO is that after normalizing the observed and simulated data, the value of DISO can express the performance of the same model at different sites”.

Wu et al. (2023) suggested that DISO has more advantages than Taylor diagrams, noting that “DISO overcomes some disadvantages of Taylor diagrams and provides an intuitive way to measure differences between various GCMs in the same assessment system”; additionally, the limitations of Taylor diagrams were discussed: “Taylor diagrams (Taylor 2001) are the most common way to assess the performance of climate products. However, they inevitably have inherent drawbacks.... The DISO (Hu et al. 2019) algorithm was designed to overcome the drawbacks that exist in Taylor diagrams. First, DISO has a higher dimensionality than Taylor diagrams... In addition, DISO can evaluate the performance of a model based on multiple metrics at the same time, which can reflect the performance of the model in different aspects”. The comprehensive

performance of the CCHZ-DISO has been explored in many studies (Zhuang et al., 2023; Liu et al., 2022; Longo-Minnolo et al., 2022; Ma et al., 2022; Yin et al., 2022).

The third-party evaluations unequivocally indicate that, in comparison to Taylor diagrams, CCHZ-DISO exhibits superior advantages. It stands as an efficient and highly effective approach for the comprehensive quantification of performance across diverse models, providing a holistic assessment of their overall capabilities.

### **References:**

Deng, M., Meng, X. and Lu, Y., et al., 2021, Impact and Sensitivity Analysis of Soil Water and Heat Transfer Parameterizations in Community Land Surface Model on the Tibetan Plateau, *Journal of Advances in Modeling Earth Systems*, 13, e2021MS002670.

Kalmar, T., Pieczka, H. and Pongracz, R., 2021, A sensitivity analysis of the different setups of the RegCM 4.5 model for the Carpathian region, *International Journal of Climatology*, 41, E1180-E1201,

Hu, Z., Chen, X. and Zhou, Q., et al., 2019, DISO: A rethink of Taylor diagram. *International Journal of Climatology*, 39(5), 2825-2832.

Liu, Z., Huang, J. and Xiao, X., et al., 2022, The capability of CMIP6 models on seasonal precipitation extremes over Central Asia, *Atmospheric Research*, 278, 106364.

Longo-Minnolo, G., Vanella, D. and Consoli, S., et al., 2022, Assessing the use of ERA5-Land reanalysis and spatial interpolation methods for retrieving precipitation estimates at basin scale, *Atmospheric Research*, 271, 106131.

Ma, R., Xiao, J. and Liang, S., 2022, Pixel-level parameter optimization of a terrestrial biosphere model for improving estimation of carbon fluxes with an efficient model-data fusion method and satellite-derived LAI and GPP data, *Geoscientific Model Development*, 15, 6637-6657.

Taylor, K., 2001, Summarizing multiple aspects of model performance in a single diagram. *Journal of Geophysical Research*, 106, 7183-7192.

Wu, F., Jiao, D. and Yang, X., et al., 2023, Evaluation of NEX-GDDP-CMIP6 in

simulation performance and drought capture utility over China-based on DISO, Hydrology Research, doi: 10.2166/nh.2023.140.

Yin, W., Yang, S. and Hu, L., et al., 2022, Improving understanding of spatiotemporal water storage changes over China based on multiple datasets, Journal of Hydrology, 612, 128098.

Zhuang, S., Fang, S. and Goto, D., et al., 2023, Model behavior regarding in- and below-cloud  $^{137}\text{Cs}$  wet scavenging following the Fukushima accident using 1-km-resolution meteorological field data, Science of the Total Environment, 872, 162165.
